# Supplementary material for: Influence of Y Doping on Catalytic Activity of CeO2, MnOx, and CeMnOx Catalysts for Selective Catalytic Reduction of NO by NH3
Source: MDPI journal article supplement (doi:10.3390/catal13050901), 2023-05-17
Supplement: s1 [file s1]

Supplementary Materials

# Influence of Y Doping on Catalytic Activity of $\text{CeO}_2$ , $\text{MnO}_x$ , and $\text{CeMnO}_x$ Catalysts for Selective Catalytic Reduction of NO by $\text{NH}_3$

Eleonora La Greca <sup>1</sup>, Tamara S. Kharlamova <sup>2</sup>, Maria V. Grabchenko <sup>2</sup>, Valery A. Svetlichnyi <sup>3</sup>, Giuseppe Pantaleo <sup>1</sup>, Luca Consentino <sup>1</sup>, Olga A. Stonkus <sup>4</sup>, Olga V. Vodyankina <sup>2,\*</sup> and Leonarda Francesca Liotta <sup>1,\*</sup>

<sup>1</sup> Institute for the Study of Nanostructured Materials (ISMN), National Research Council (CNR), Via Ugo La Malfa 153, 90146 Palermo, Italy

<sup>2</sup> Laboratory of Catalytic Research, Tomsk State University, Lenin Ave. 36, 634050 Tomsk, Russia

<sup>3</sup> Laboratory of Advanced Materials and Technology, Tomsk State University, Lenin Ave. 36, 634050 Tomsk, Russia

<sup>4</sup> Borekov Institute of Catalysis SB RAS, Lavrentiev Ave. 5, 630090 Novosibirsk, Russia

\* Correspondence: vodyankina\_o@mail.ru (O.V.V.); leonardafrancesca.liotta@cnr.it (L.F.L.)

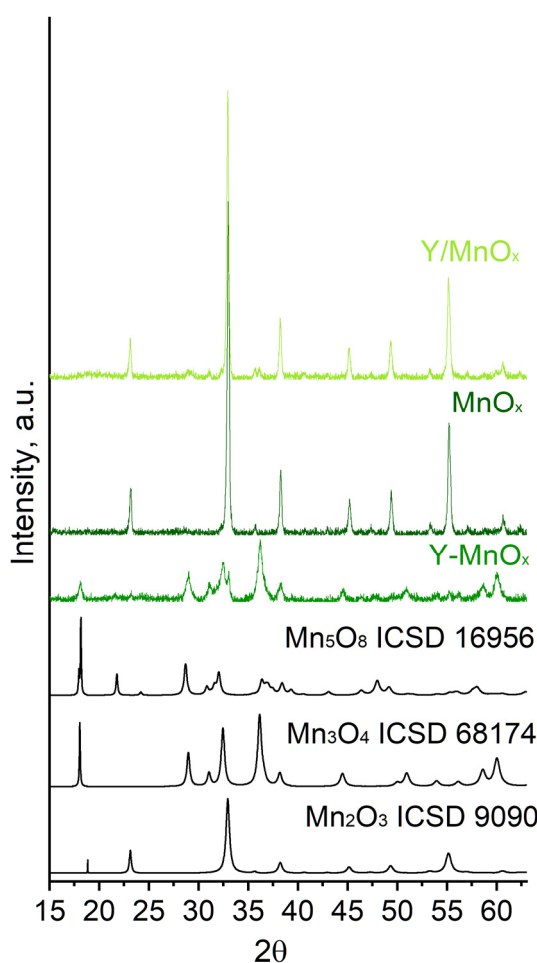

**Figure S1.** XRD patterns for samples calcined at 650 °C.
